# Supplementary material
Source: Springer Nature journal article supplement (https://www.springermedizin.de/resource/supplementary/13000_2010_267_MOESM7_ESM.pdf/9624196)

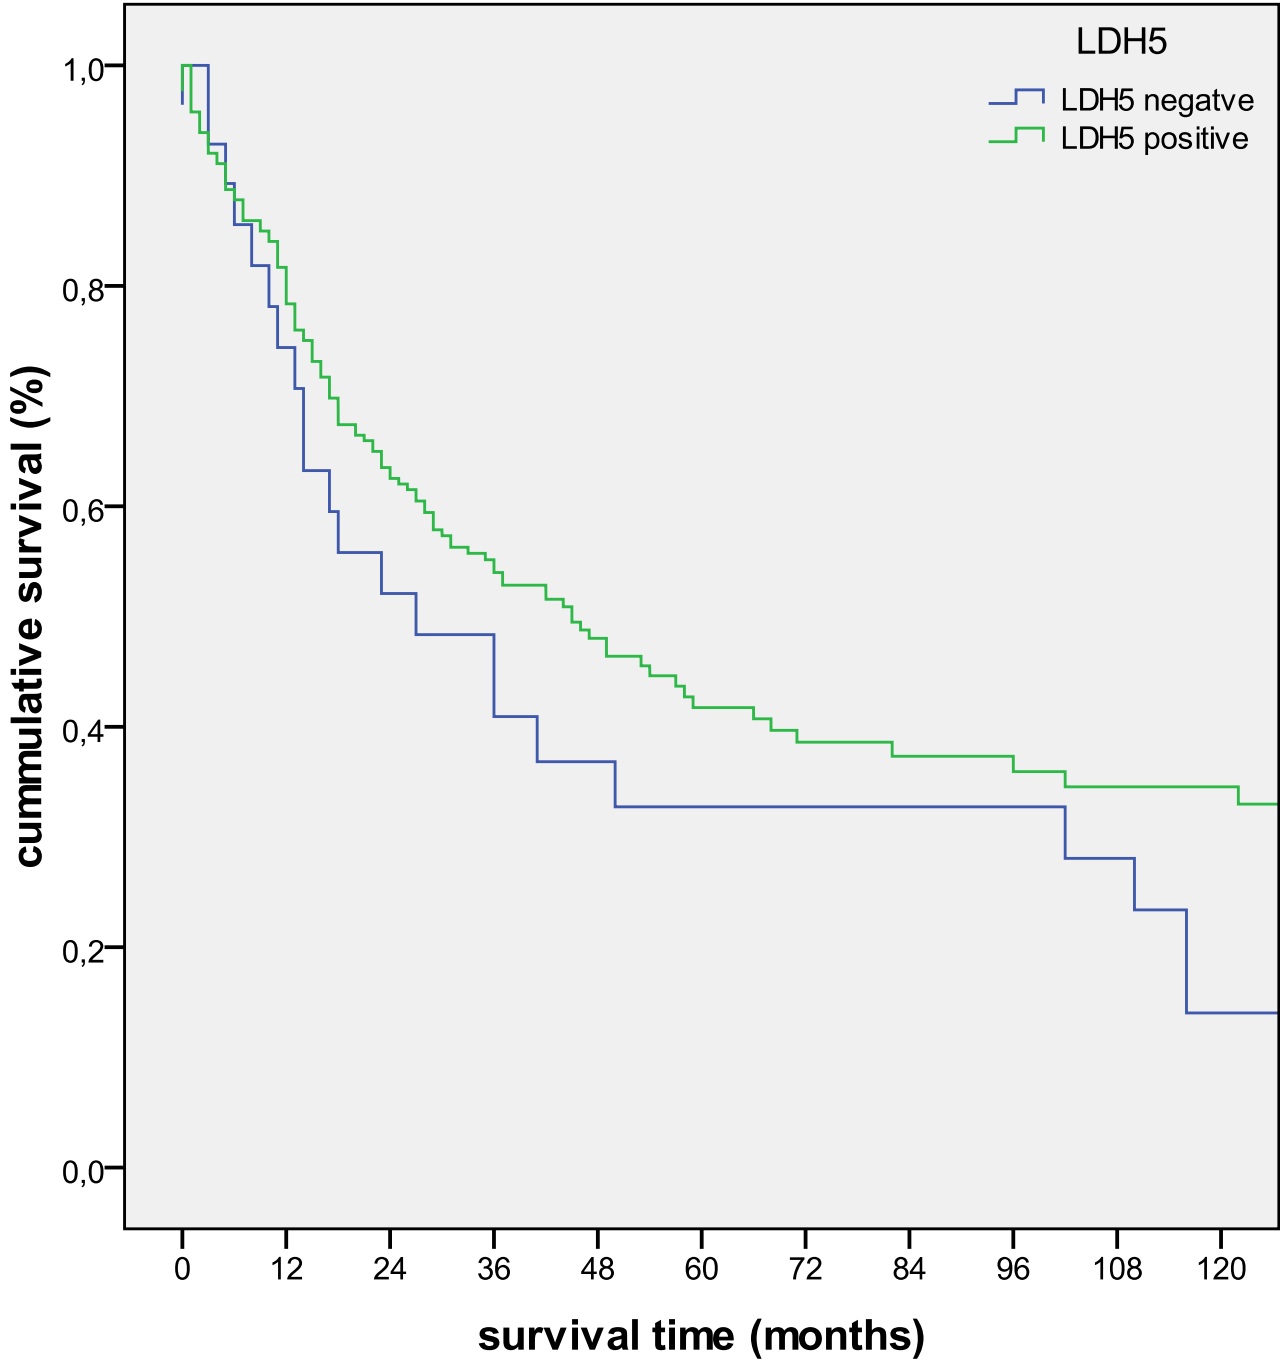

Supplement: MOESM7 [file 9624196]
